# Supplementary material for: Immunodominance of Antigenic Site B over Site A of Hemagglutinin of Recent H3N2 Influenza Viruses
Source: PubMed Central journal article supplement (PMC3405050; doi:10.1371/journal.pone.0041895), 2012-07-25
Supplement: pone.0041895.s001.pdf [file pone.0041895.s001.pdf]

Table S1. Overall affinity (Kd) of binding of human antibodies to 309 HA and mutants after vaccination against A/Wisconsin/67/05 in the 2006-07 trivalent vaccine.

| sample | Kd, 10 <sup>-3</sup> µl plasma ± SD |             |               |                 |          |                 |          |          |                 |          |                  |
|--------|-------------------------------------|-------------|---------------|-----------------|----------|-----------------|----------|----------|-----------------|----------|------------------|
|        | 309 HA                              | HL156-157KS | KFK158-160GST | NDQI189-192QEQT | A196V    | NNES121-124ITEG | N126T    | N133     | TSSS135-138GSNA | K140I    | RSNNS142-146PGSG |
| 048    | 11.6±0.2                            | 9.9±0.1     | 11.9±0.6      | 10.7±0.2        | 10.0±4.0 | 8.6±2.9         | 9.8±5.1  | 10.0±3.9 | 12.0±1.9        | 13.8±3.0 | 9.4±2.8          |
| x14    | 11.3±0.3                            | 14.0±0.2    | 22.4±0.4      | 13.1±0.6        | 12.0±3.0 | 12.4±2.6        | 9.6±4.8  | 11.9±3.7 | 12.2±3.5        | 15.6±3.5 | 16.2±6           |
| 006    | 4.3±0.4                             | 5.0±0.2     | 3.3±0.8       | 3.5±0.1         | 3.1±1.8  | 2.9±0.4         | 3.8±1.1  | 3.2±0.4  | 2.9±0.4         | 4.8±0.7  | 3.1±1.1          |
| 119    | 5.7±0.5                             | 7.8±0.3     | 4.9±0.8       | 4.4±0.6         | 4.9±0.6  | 6.8±0.4         | 5.6±0.6  | 5.6±0.5  | 5.2±0.8         | 6.9±1.5  | 6.1±1.8          |
| 078    | 2.2±0.3                             | 3.0±0.3     | 3.5±0.5       | 3.3±0.3         | 2.4±0.3  | 1.8±0.4         | 2.4±1.2  | 2.3±0.4  | 1.7±0.5         | 2.8±1.2  | 2.6±0.4          |
| 082    | 5.4±0.9                             | 8.7±0.7     | 7.2±1.1       | 6.7±3.8         | 6.1±0.7  | 4.4±1.8         | 5.5±1.4  | 3.2±0.4  | 3.7±0.7         | 3.8±1.4  | 3.3±1.4          |
| 256    | 4.4±1.7                             | 5.4±2.8     | 2.3±0.5       | 4.2±0.1         | 4.5±1.1  | 8.8±0.9         | 9.2±1.3  | 9.3±4.4  | 4.1±2.2         | 14.0±1.0 | 9.0±1.8          |
| 014    | 3.1±1.4                             | 3.8±0.9     | 3.6±1.3       | 2.2±1.0         | 3.0±0.5  | 3.7±1.6         | 3.4±0.8  | 3.9±1.6  | 4.0±1.0         | 3.8±0.9  | 3.2±1.9          |
| 080    | 27.8±7.4                            | 17.0±1.5    | 29.2±1.4      | 31.3±11.9       | 28.7±6.8 | 33.2±3.0        | 20.2±5.7 | 26.0±9.3 | 18.8±5.2        | 19.7±5.1 | 23.2±5.1         |
| 013    | 2.0±0.6                             | 2.1±0.1     | 2.2±0.1       | 1.9±0.2         | 2.0±0.8  | 1.9±0.3         | 1.7±0.5  | 1.5±0.5  | 2.1±0.9         | 1.6±0.7  | 1.7±0.7          |
| 040    | 6.3±2.4                             | 8.0±1.3     | 11.9±2.1      | 8.2±2.6         | 7.0±1.7  | 8.8±3.5         | 8.4±3.9  | 10.5±4.0 | 7.5±2.5         | 9.6±3.1  | 7.2±2.1          |
| 061    | 10.8±2.8                            | 12.7±0.7    | 29.9±2.3      | 15.9±4.2        | 11.0±2.7 | 13.0±2.0        | 13.1±2.8 | 11.8±2.0 | 13.2±1.9        | 10.1±2.5 | 10.5±1.3         |
| 049    | 9.2±3.8                             | 14.2±2.6    | 15.4±1.9      | 10.7±1.1        | 7.6±1.7  | 12.4±3.0        | 9.6±1.6  | 15.6±5.0 | 12.2±4.1        | 22.7±3.1 | 16.2±2.3         |
| 030    | 2.6±0.6                             | 3.8±0.8     | 4.0±0.7       | 3.7±0.4         | 2.4±1.0  | 2.6±1.1         | 2.4±0.4  | 2.0±0.5  | 2.5±0.6         | 2.3±0.4  | 1.7±0.3          |
| 200    | 9.0±1.6                             | 16.5±0.9    | 13.3±3.2      | 10.1±1.0        | 6.9±1.3  | 5.4±1.4         | 6.5±1.5  | 6.9±0.9  | 5.4±1.0         | 11.9±0.4 | 6.1±1.0          |
| 182    | 12.7±0.6                            | 12.7±1.2    | 22.3±4.6      | 10.2±4.5        | 10.9±1.1 | 9.8±0.6         | 10.7±1.6 | 12.3±1.1 | 12.5±0.6        | 11.2±1.0 | 13.0±3.0         |
| 016    | 2.8±1.2                             | 3.1±0.3     | 6.8±0.8       | 3.9±0.6         | 3.8±0.9  | 3.9±0.9         | 3.7±1.2  | 2.8±1.1  | 4.1±1.3         | 3.1±1.5  | 3.5±1.1          |
| y14    | 15.3±3.9                            | 16.0±4.5    | 23.3±3.3      | 10.4±6.5        | 11.0±2.8 | 15.1±2.3        | 8.8±2.1  | 9.1±3.7  | 8.1±0.7         | 25.2±0.9 | 9.7±0.8          |
