# Supplementary material for: Immunodominance of Antigenic Site B over Site A of Hemagglutinin of Recent H3N2 Influenza Viruses
Source: PubMed Central journal article supplement (PMC3405050; doi:10.1371/journal.pone.0041895), 2012-07-25
Supplement: pone.0041895.s002.pdf [file pone.0041895.s002.pdf]

Table S2. Overall affinity (Kd) of binding of human antibodies to 309 HA and mutants after vaccination against A/Uruguay/716/07 in the 2008-09 trivalent vaccine.

| sample | Kd, 10 <sup>-3</sup> µl plasma ± SD |             |               |                 |          |                 |          |          |                 |           |                  |
|--------|-------------------------------------|-------------|---------------|-----------------|----------|-----------------|----------|----------|-----------------|-----------|------------------|
|        | 309 HA                              | HL156-157KS | KFK158-160GST | NDQI189-192QEQT | A196V    | NNES121-124ITEG | N126T    | N133     | TSSS135-138GSNA | K140I     | RSNNS142-146PGSG |
| 022    | 10.4±1.4                            | 13.7±3.2    | 26.6±7.0      | 16.8±6.0        | 10.9±2.9 | 10.0±3.3        | 11.8±3.6 | 11.2±3.0 | 10.0±2.7        | 10.9±1.8  | 11.7±3.1         |
| 062    | 12.9±3.6                            | 15.2±4.5    | 12.6±2.7      | 9.7±3.9         | 11.9±1.3 | 10.7±3.5        | 11.7±3.6 | 12.2±2.9 | 10.0±2.7        | 14.4±1.8  | 14.2±3.7         |
| 040    | 31.0±1.6                            | 21.0±2.4    | 21.7±5.0      | 26.3±3.8        | 34.0±5.9 | 18.7±4.2        | 20.8±1.9 | 31.3±8.4 | 21.3±5.7        | 33.2±10.5 | 21.7±1.1         |
| 065    | 16.8±3.2                            | 11.4±2.6    | 20.5±7.8      | 19.2±1.3        | 17.1±6.5 | 25.6±4.9        | 25.2±6.9 | 27.3±6.7 | 18.3±4.5        | 21.4±5.0  | 28.7±8.0         |
| 057    | 0.8±0.1                             | 0.8±0.01    | 1.7±0.5       | 0.8±0.3         | 0.7±0.09 | 0.9±0.1         | 0.9±0.01 | 0.8±0.1  | 0.7±0.1         | 0.9±0.1   | 0.5±0.01         |
| 131    | 5.1±2.4                             | 7.9±3.0     | 15.3±2.9      | 5.6±2.1         | 5.0±3.8  | 8.8±4.0         | 6.7±1.5  | 5.1±2.4  | 5.0±1.4         | 5.4±1.5   | 7.8±3.9          |
| 030    | 7.3±1.3                             | 7.0±0.5     | 9.1±0.9       | 9.0±1.5         | 8.6±0.8  | 8.1±1.3         | 8.4±0.9  | 6.5±0.8  | 8.2±1.5         | 7.6±1.3   | 8.0±1.7          |
| 200    | 4.0±1.5                             | 8.0±0.3     | 9.1±0.9       | 6.8±1.3         | 5.2±2.5  | 4.0±0.9         | 4.9±1.0  | 4.6±0.4  | 5.0±1.4         | 4.2±1.0   | 3.7±1.5          |
| 182    | 5.2±0.9                             | 5.3±0.7     | 7.2±0.2       | 5.3±1.1         | 5.1±2.1  | 5.9±1.2         | 4.7±0.8  | 6.1±0.7  | 4.6±0.9         | 4.9±0.7   | 6.4±1.9          |
| 016    | 3.3±0.9                             | 4.0±0.4     | 7.9±0.6       | 3.5±0.9         | 2.5±0.3  | 2.9±0.8         | 3.0±1.0  | 3.0±0.9  | 2.8±0.5         | 3.3±0.9   | 2.7±0.9          |
| y14    | 13.2±2.7                            | 14.8±3.1    | 18.3±2.1      | 12.4±2.8        | 12.0±2.8 | 13.3±4.6        | 13.1±2.5 | 12.0±3.1 | 12.1±2.4        | 11.4±2.7  | 13.6±3.7         |
